# Supplementary material for: Keratoconus-susceptibility gene identification by corneal thickness genome-wide association study and artificial intelligence IBM Watson
Source: PubMed Central journal article supplement (PMC7395727; doi:10.1038/s42003-020-01137-3), 2020-07-31
Supplement: 42003_2020_1137_MOESM4_ESM.pdf [file 42003_2020_1137_MOESM4_ESM.pdf]

## Description of Additional Supplementary Files

**File Name: Supplementary Data 1**

**Description:** All SNPs with P value  $> 1.0 \times 10^{-4}$  in the discovery GWAS.

**File Name: Supplementary Data 2**

**Description:** Associations between previously reported genes with CCT in the GWAS discovery stage
